# Supplementary material
Source: publisher figshare collection journal article supplement (https://aacr.figshare.com/articles/dataset/_/22633003)
Supplement: Supplementary file 1 [file 40161355]

## Supplemental Fig. 2.

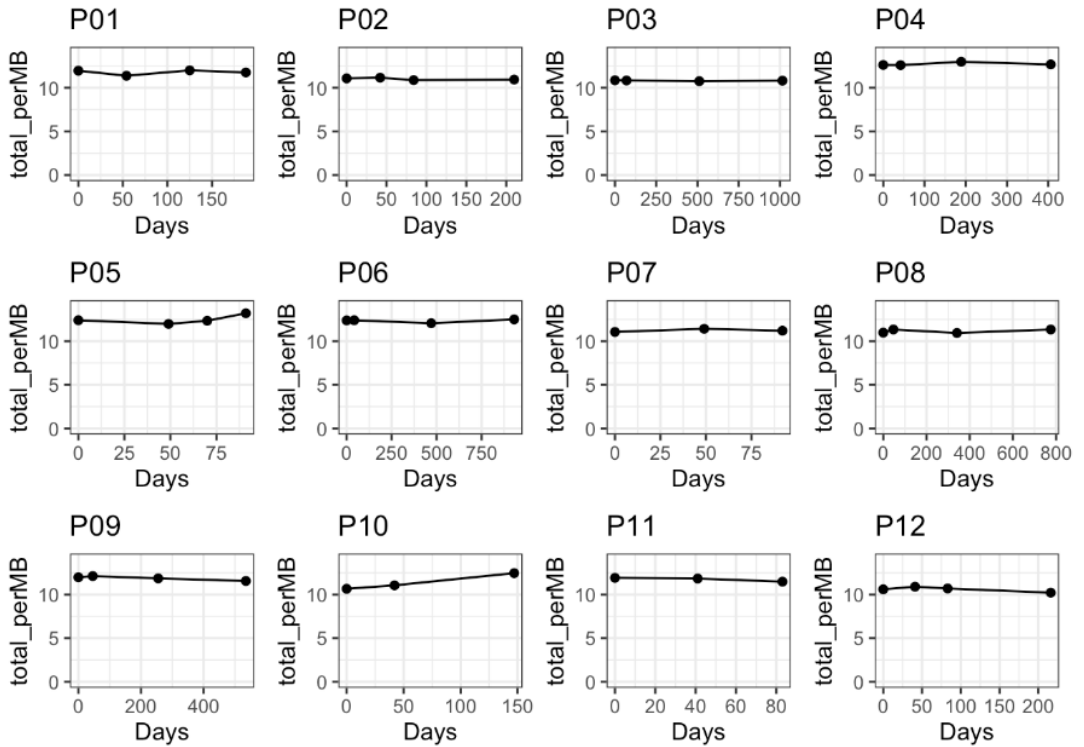

**Supplemental Fig. 2. Total mutation Burden by MB.** Total mutation burden/megabase in the four plasma samples is plotted for each patient (see Fig. 1).
